# Supplementary material for: Supramolecular hydration structure of graphene-based hydrogels: density functional theory, green chemistry and interface application
Source: publisher site journal article supplement (doi:10.3762/bjnano.16.61), 2025-06-04
Supplement: Additional file 1 [file 2190-4286-16-61-S1.pdf]

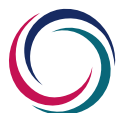

## Supporting Information

for

### **Supramolecular hydration structure of graphene-based hydrogels: density functional theory, green chemistry and interface application**

Hon Nhien Le, Duy Khanh Nguyen, Minh Triet Dang, Huyen Trinh Nguyen, Thi Bang Tam Dao, Trung Do Nguyen, Chi Nhan Ha Thuc and Van Hieu Le

*Beilstein J. Nanotechnol.* **2025**, *16*, 806–822. doi:10.3762/bjnano.16.61

## Additional figures and tables

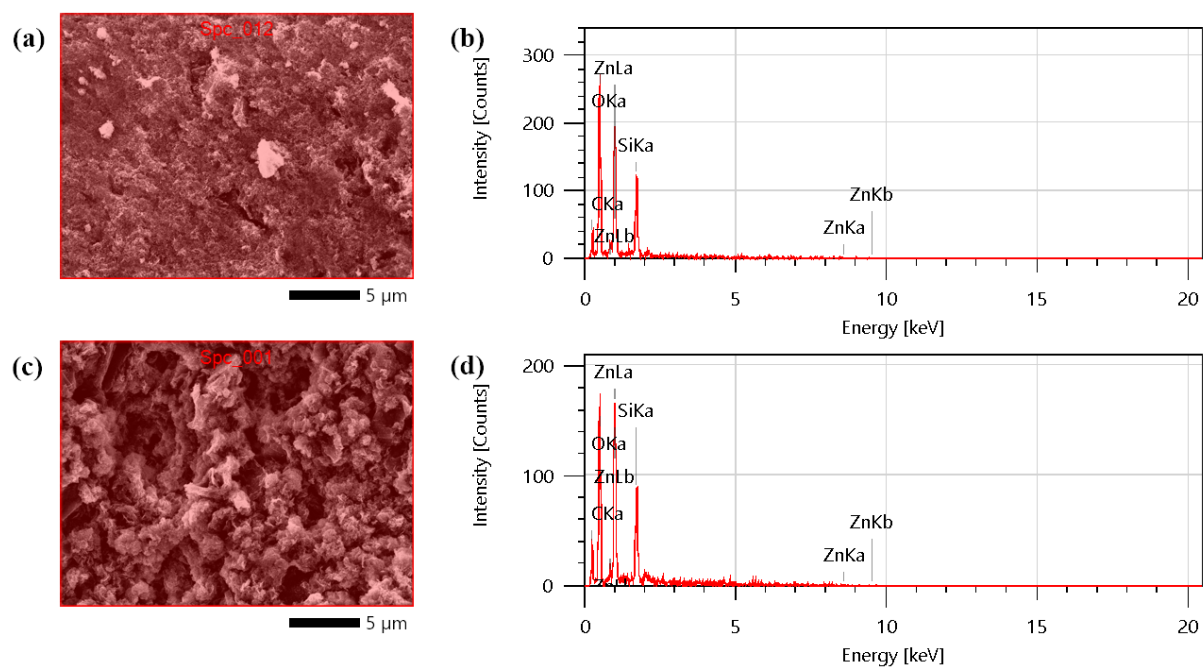

**Figure S1:** SEM-EDS analysis. SEM image (a) and EDS spectrum (b) of the analyzed area in GO-SG-ZH powder. SEM image (c) and EDS spectrum (d) of the analyzed area in GO-SG-ZH hydrogel.

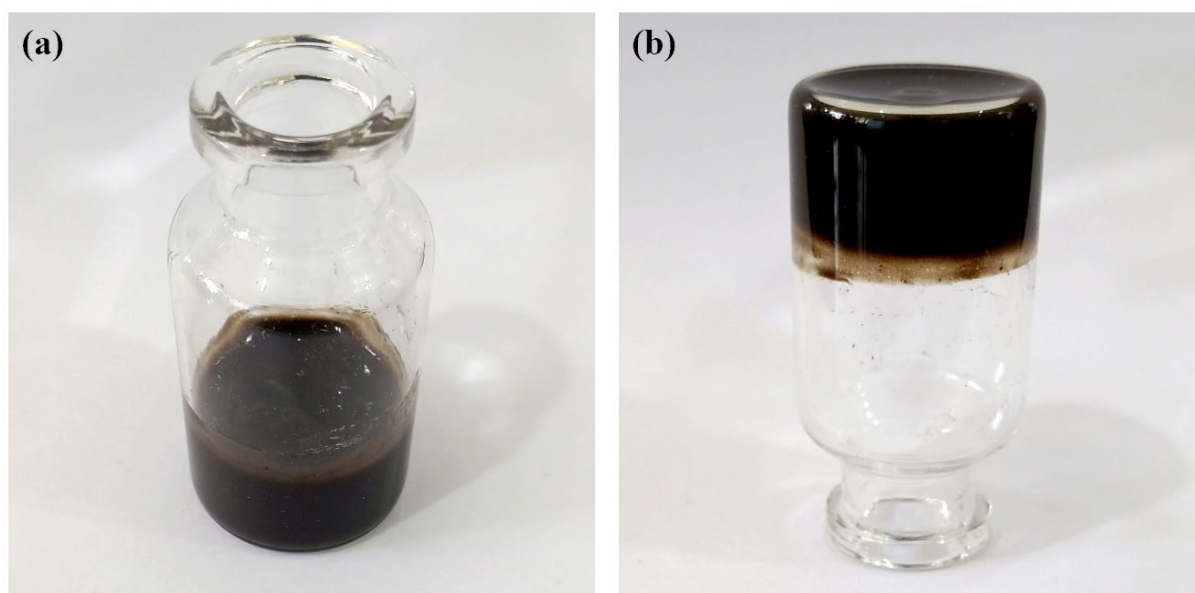

**Figure S2:** Photographs of GO-SG-ZH hydrogel.

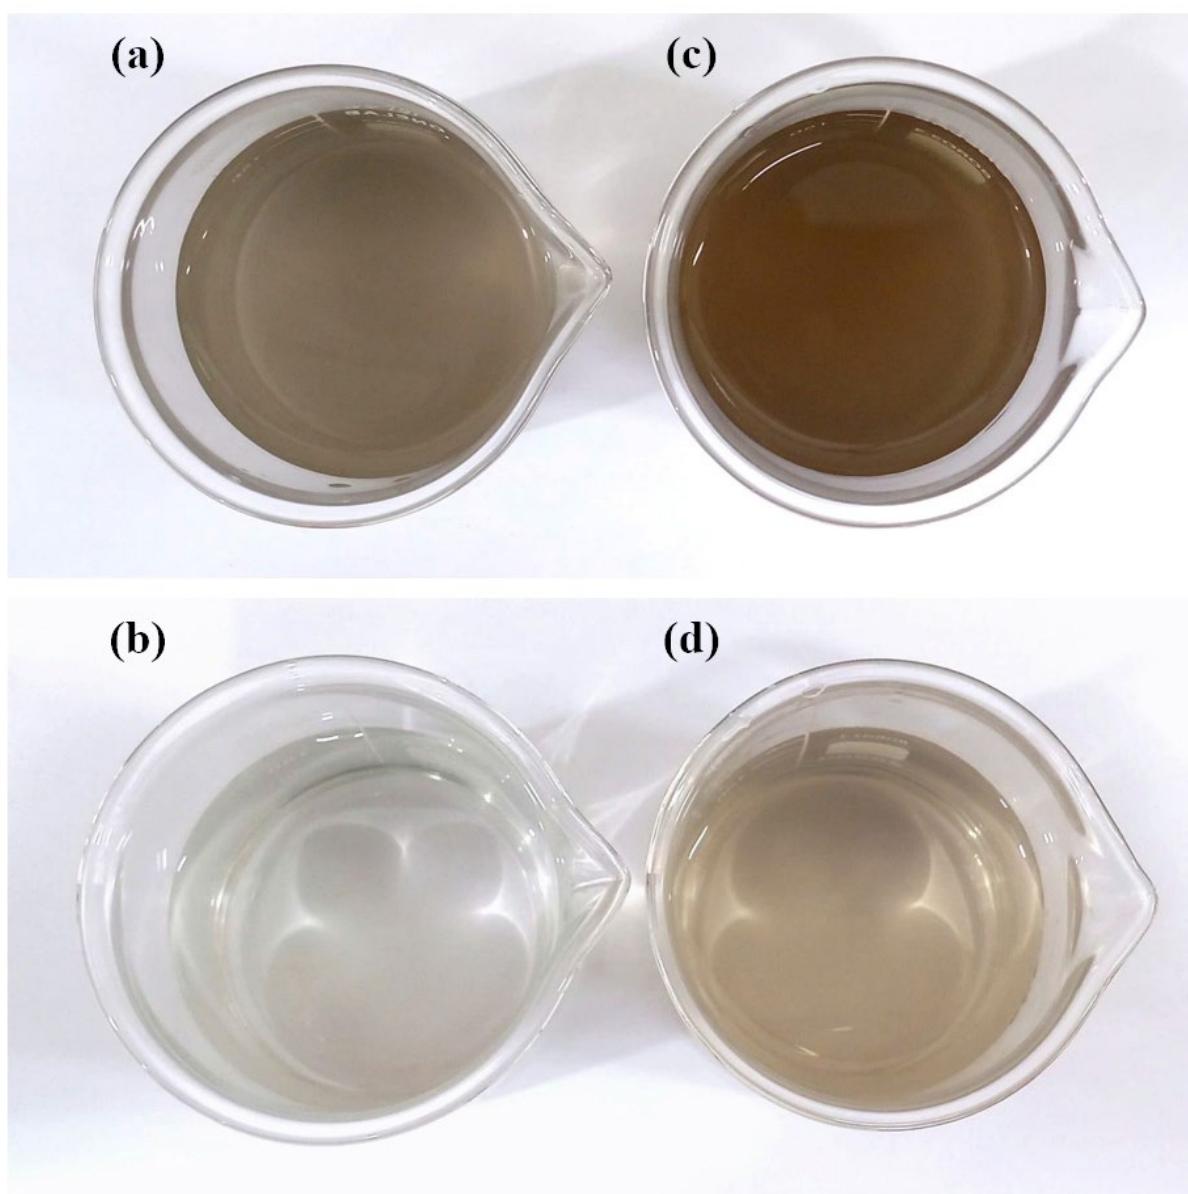

**Figure S3:** Aqueous dispersions of GO-SG-ZH powder in water at the concentrations of 200 (a) and 50 ppm (b). Aqueous dispersions of GO-SG-ZH hydrogel at the concentrations of 200 (c) and 50 ppm (d).

**Table S1:** Value results of tensile measurement of SG/PLA films.

| No.     | Maximum Load N | Elasticity Modulus MPa | Max Load Stress MPa | Max Load Strain strain | Max Load Elong % | Break Elong % | Break Energy kgf-mm | Sample Thickness mm |
|---------|----------------|------------------------|---------------------|------------------------|------------------|---------------|---------------------|---------------------|
| 1       | 58.35          | 2426.64                | 51.18               | 0.03                   | 2.68             | 4.82          | 4.14                | 0.190               |
| 2       | 59.10          | 2457.00                | 50.51               | 0.03                   | 2.54             | 4.00          | 3.25                | 0.195               |
| 3       | 50.65          | 2481.77                | 46.90               | 0.02                   | 2.36             | 4.16          | 2.96                | 0.180               |
| 4       | 46.70          | 2422.90                | 48.65               | 0.02                   | 2.44             | 4.27          | 2.86                | 0.160               |
| Average | 53.70          | 2447.08                | 49.31               | 0.03                   | 2.50             | 4.31          | 3.30                | 0.181               |
| Std     | 6.03           | 27.71                  | 1.93                | 0.01                   | 0.14             | 0.36          | 0.58                | 0.015               |

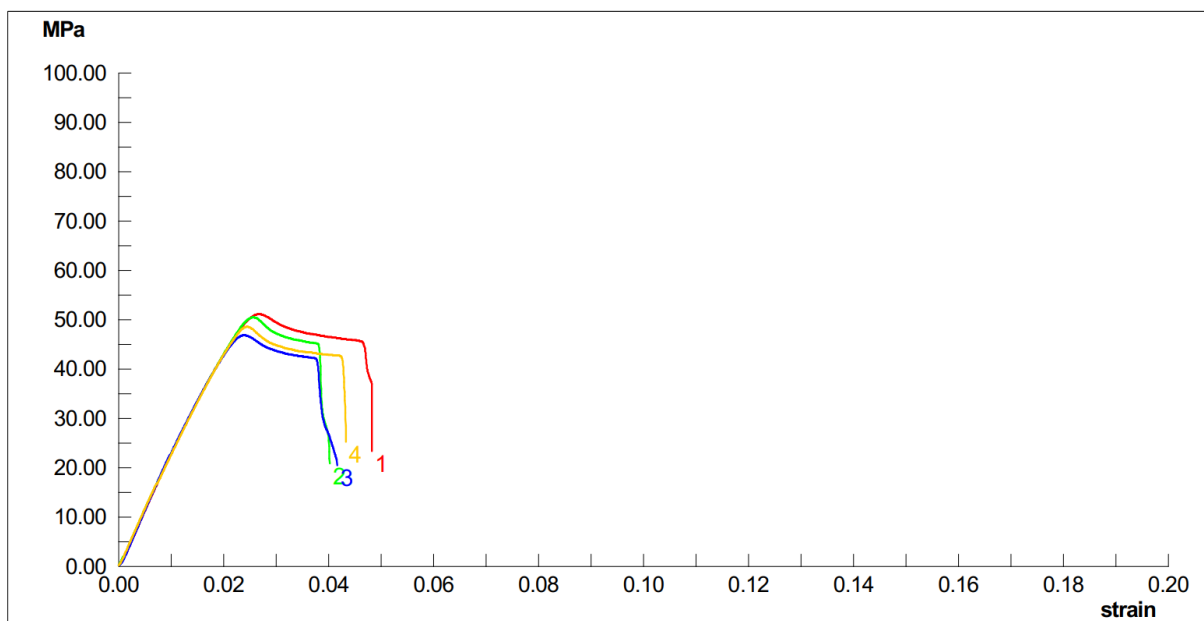

**Figure S4:** Stress–strain curves of tensile testing of SG/PLA films.

**Table S2:** Value results of tensile measurement of GO-SG-ZH/PLA films.

| No.     | Maximum Load N | Elasticity Modulus MPa | Max Load Stress MPa | Max Load Strain strain | Max Load Elong % | Break Elong % | Break Energy kgf-mm | Sample Thickness mm |
|---------|----------------|------------------------|---------------------|------------------------|------------------|---------------|---------------------|---------------------|
| 1       | 62.40          | 2122.40                | 54.74               | 0.04                   | 3.86             | 7.76          | 7.33                | 0.190               |
| 2       | 68.65          | 2118.82                | 57.21               | 0.04                   | 4.42             | 4.57          | 3.52                | 0.200               |
| 3       | 63.65          | 2314.17                | 55.83               | 0.04                   | 4.03             | 9.13          | 9.08                | 0.190               |
| 4       | 56.65          | 2268.11                | 49.69               | 0.03                   | 3.32             | 6.45          | 5.54                | 0.190               |
| 5       | 61.15          | 2339.98                | 53.64               | 0.04                   | 3.59             | 8.24          | 7.58                | 0.190               |
| Average | 62.50          | 2232.70                | 54.22               | 0.04                   | 3.84             | 7.23          | 6.61                | 0.192               |
| Std     | 4.34           | 105.52                 | 2.86                | 0.00                   | 0.42             | 1.77          | 2.14                | 0.004               |

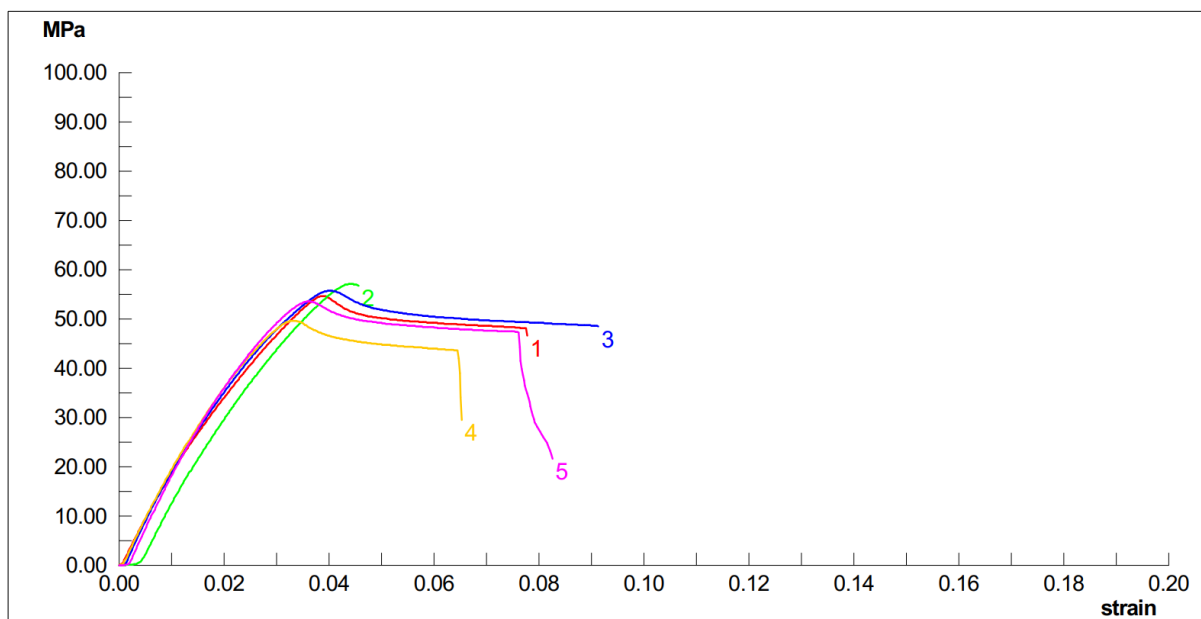

**Figure S5:** Stress–strain curves of tensile testing of GO-SG-ZH/PLA films.

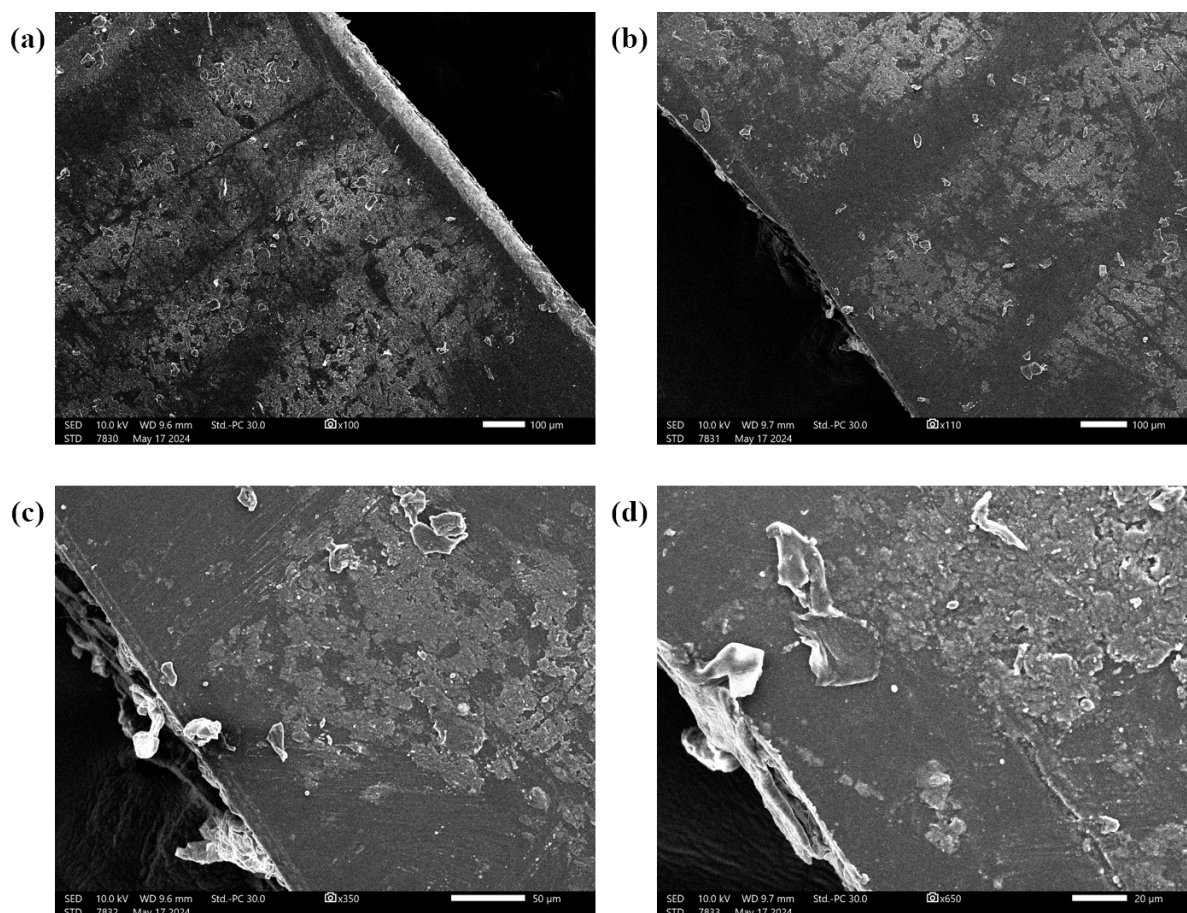

**Figure S6:** SEM images of surfaces and fractures of GO-SG-ZH/PLA films after tensile testing. The fractures were generated by the tensile measurement.
